# Supplementary material for: A Large‐Scale Multicenter Study Validates Aldo‐Keto Reductase Family 1 Member B10 as a Prevalent Serum Marker for Detection of Hepatocellular Carcinoma
Source: PubMed Central journal article supplement — Hepatology. 2019 Apr 6;69(6):2489–501. doi: 10.1002/hep.30519 (PMC6593451; doi:10.1002/hep.30519), 2019-04-06
Supplement: HEP-69-2489-s001.pdf [file HEP-69-2489-s001.pdf]

## Supporting Data

### **A Large-Scale Multicenter Study Validates AKR1B10 as a New Prevalent Serum Marker for Detection of Hepatocellular Carcinoma**

Xu Ye,<sup>1\*</sup> Cunyan Li,<sup>2\*</sup> Xuyu Zu,<sup>3\*</sup> Minglin Lin,<sup>4\*</sup> Qiang Liu,<sup>1</sup> Jianghua Liu,<sup>3</sup> Guoguo Xu,<sup>5</sup>  
Zhiyong Chen,<sup>5</sup> Yongliang Xu,<sup>5</sup> Long Liu,<sup>5</sup> Diteng Luo,<sup>4</sup> Zhe Cao,<sup>5</sup> Guiyuan Shi,<sup>5</sup> Zirui Feng,<sup>6</sup>  
Hongyu Deng,<sup>1</sup> Qianjin Liao,<sup>1</sup> Chuan Cai,<sup>6</sup> Duan-Fang Liao,<sup>6</sup> Jing Wang,<sup>1†</sup> Junfei Jin,<sup>4†</sup> and  
Deliang Cao<sup>1,6†</sup>

<sup>1</sup>Hunan Cancer Hospital and the Affiliated Cancer Hospital of Xiangya School of Medicine,  
Central South University, Hunan, China.

<sup>2</sup>Department of Laboratory Medicine, Hunan Provincial People's Hospital/the First Affiliated  
Hospital of Hunan Normal University, Hunan, China.

<sup>3</sup>Institute of Clinical Medicine, the First Affiliated Hospital of University of South China, Hunan,  
China.

<sup>4</sup>Laboratory of Hepatobiliary and Pancreatic Surgery, Affiliated Hospital of Guilin Medical  
University, Guangxi, China.

<sup>5</sup>Light of Life Biotechnology Co., Ltd., Hunan, China.

<sup>6</sup>Division of Stem Cell Regulation and Application, State Key Laboratory of Chinese Medicine  
Powder and Medicine Innovation in Hunan (incubation), Hunan University of Chinese Medicine,  
Hunan, China.

\*These authors contributed equally to this work.

**†Corresponding authors:**

Deliang Cao, Ph.D., Hunan Cancer Hospital and the Affiliated Cancer Hospital of Xiangya School of Medicine, Central South University, 283 Tongzipo Road, Changsha 410013, Hunan, China. E-mail: deliangcao0062@hnszlyy.com. Tel./Fax: 86-731-88651681.

Junfei Jin, Ph.D., Laboratory of Hepatobiliary and Pancreatic Surgery, Affiliated Hospital of Guilin Medical University, 15 Lequn Road, Guilin 541001, Guangxi, China. E-mail: changliangzijin@163.com. Tel.: 86-773-2862270.

Jing Wang, Ph.D., Hunan Cancer Hospital and the Affiliated Cancer Hospital of Xiangya School of Medicine, Central South University, 283 Tongzipo Road, Changsha 410013, Hunan, China. E-mail: wangjing0081@hnszlyy.com. Tel.: 86-731-88651108.

**Table of Contents**

**- Supporting Figures (Figures S1-S9)**

**- Supporting Tables (Tables S1-S9)**

## Supporting Figures

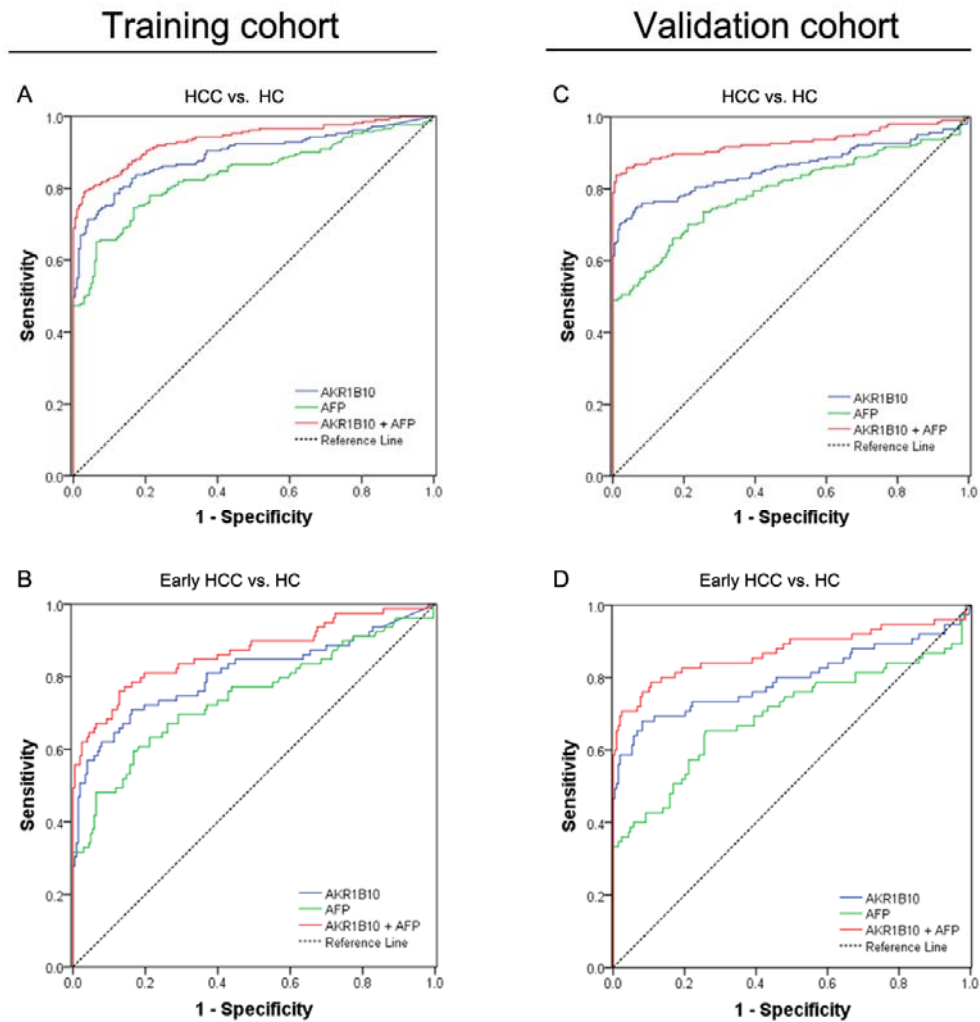

**Supporting FIG. S1.** Diagnostic accuracy of AKR1B10 in discrimination of HCC from HCs.

(A and B) ROC curve analyses of AKR1B10, AFP, or both in training cohort for patients with HCC versus HCs and patients with early HCC versus HCs, respectively. (C and D) ROC curve analyses of AKR1B10, AFP, or both in validation cohort for patients with HCC versus HCs and patients with early HCC versus HCs, respectively.

Abbreviations: AFP, alpha-fetoprotein; AKR1B10, aldo-keto reductase family 1 member B10; HCC, hepatocellular carcinoma; HC, healthy control; ROC, receiver operating characteristic.

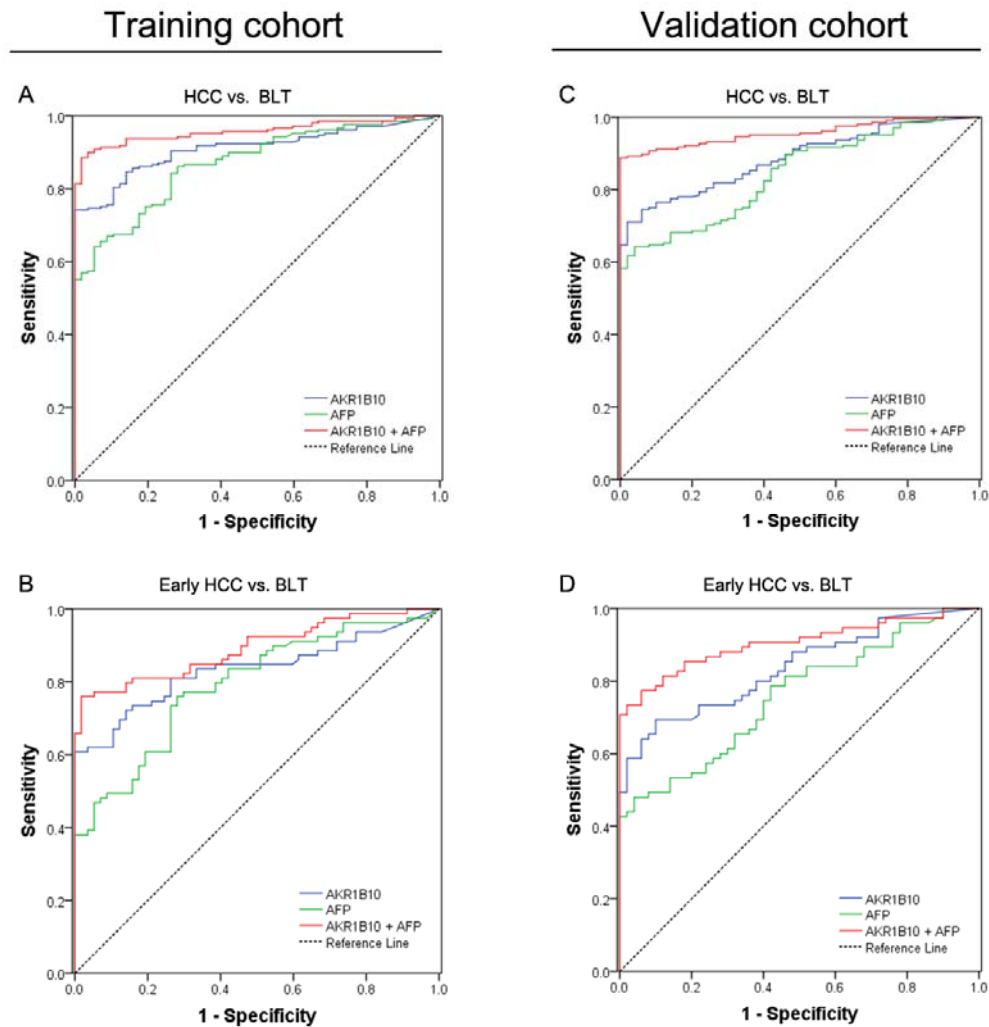

**Supporting FIG. S2.** Diagnostic accuracy of AKR1B10 in differentiating patients with HCC from patients with BLT. (A and B) ROC curve analyses of AKR1B10, AFP, or both in training cohort for patients with HCC versus patients with BLT and patients with early HCC versus patients with BLT, respectively. (C and D) ROC curve analyses of AKR1B10, AFP, or both in validation cohort for patients with HCC versus patients with BLT and patients with early HCC versus patients with BLT, respectively.

Abbreviations: AFP, alpha-fetoprotein; AKR1B10, aldo-keto reductase family 1 member B10; BLT, benign liver tumor; HCC, hepatocellular carcinoma; ROC, receiver operating characteristic.

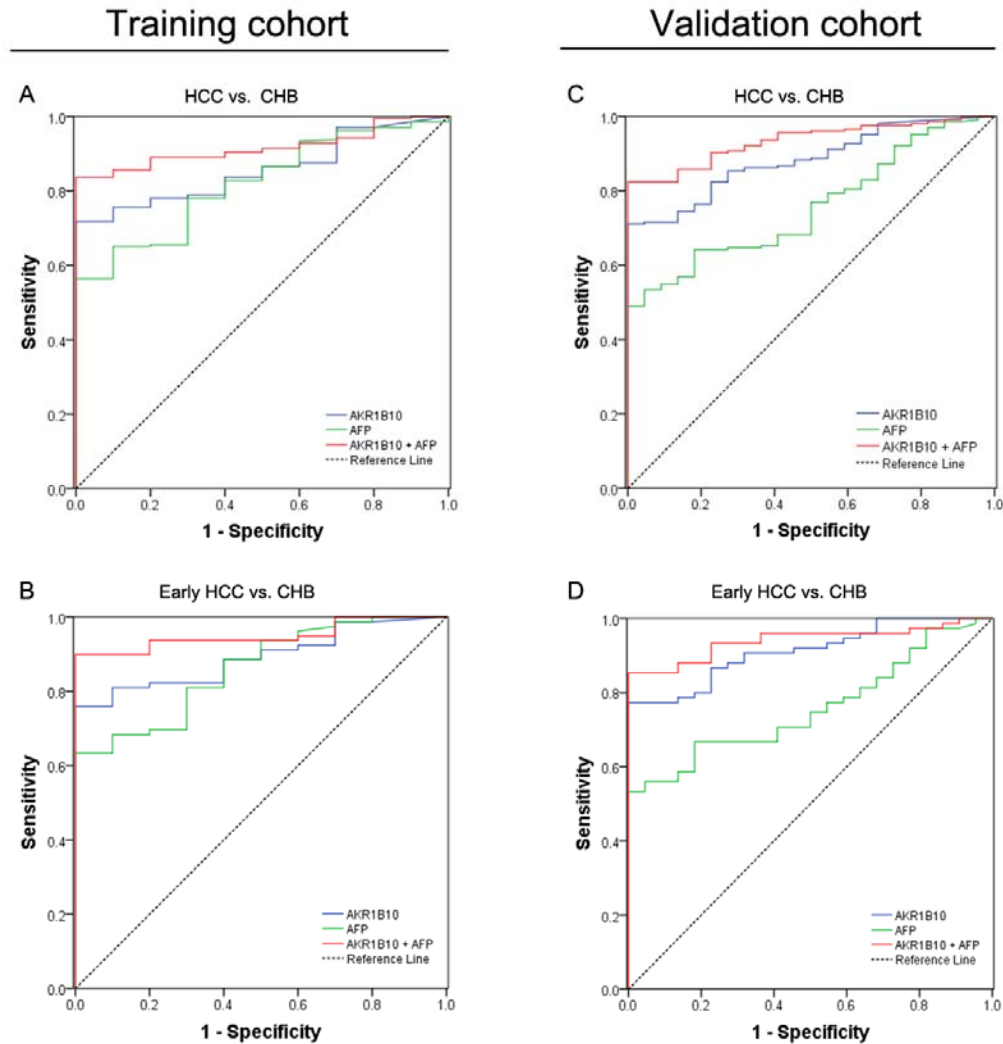

**Supporting FIG. S3.** Diagnostic accuracy of AKR1B10 in differentiating patients with HCC from patients with CHB. (A and B) ROC curve analyses of AKR1B10, AFP, or both in training cohort for patients with HCC versus patients with CHB and patients with early HCC versus patients with CHB, respectively. (C and D) ROC curve analyses of AKR1B10, AFP, or both in validation cohort for patients with HCC versus patients with CHB and patients with early HCC versus patients with CHB, respectively.

Abbreviations: AFP, alpha-fetoprotein; AKR1B10, aldo-keto reductase family 1 member B10; CHB, chronic hepatitis B; HCC, hepatocellular carcinoma; ROC, receiver operating characteristic.

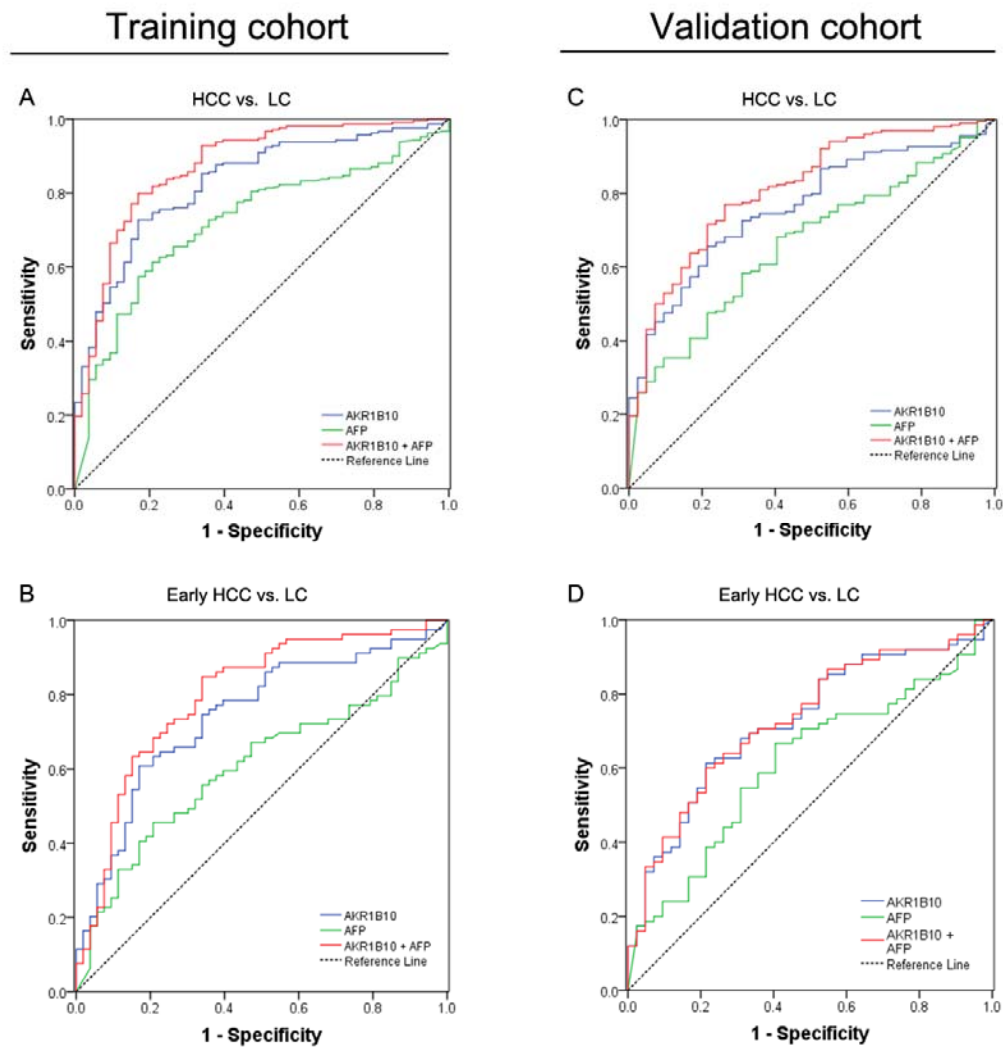

**Supporting FIG. S4.** Diagnostic accuracy of AKR1B10 in differentiating patients with HCC from patients with LC. (A and B) ROC curve analyses of AKR1B10, AFP, or both in training cohort for patients with HCC versus patients with LC and patients with early HCC versus patients with LC, respectively. (C and D) ROC curve analyses of AKR1B10, AFP, or both in validation cohort for patients with HCC versus patients with LC and patients with early HCC versus patients with LC, respectively.

Abbreviations: AFP, alpha-fetoprotein; AKR1B10, aldo-keto reductase family 1 member B10; HCC, hepatocellular carcinoma; LC, liver cirrhosis; ROC, receiver operating characteristic.

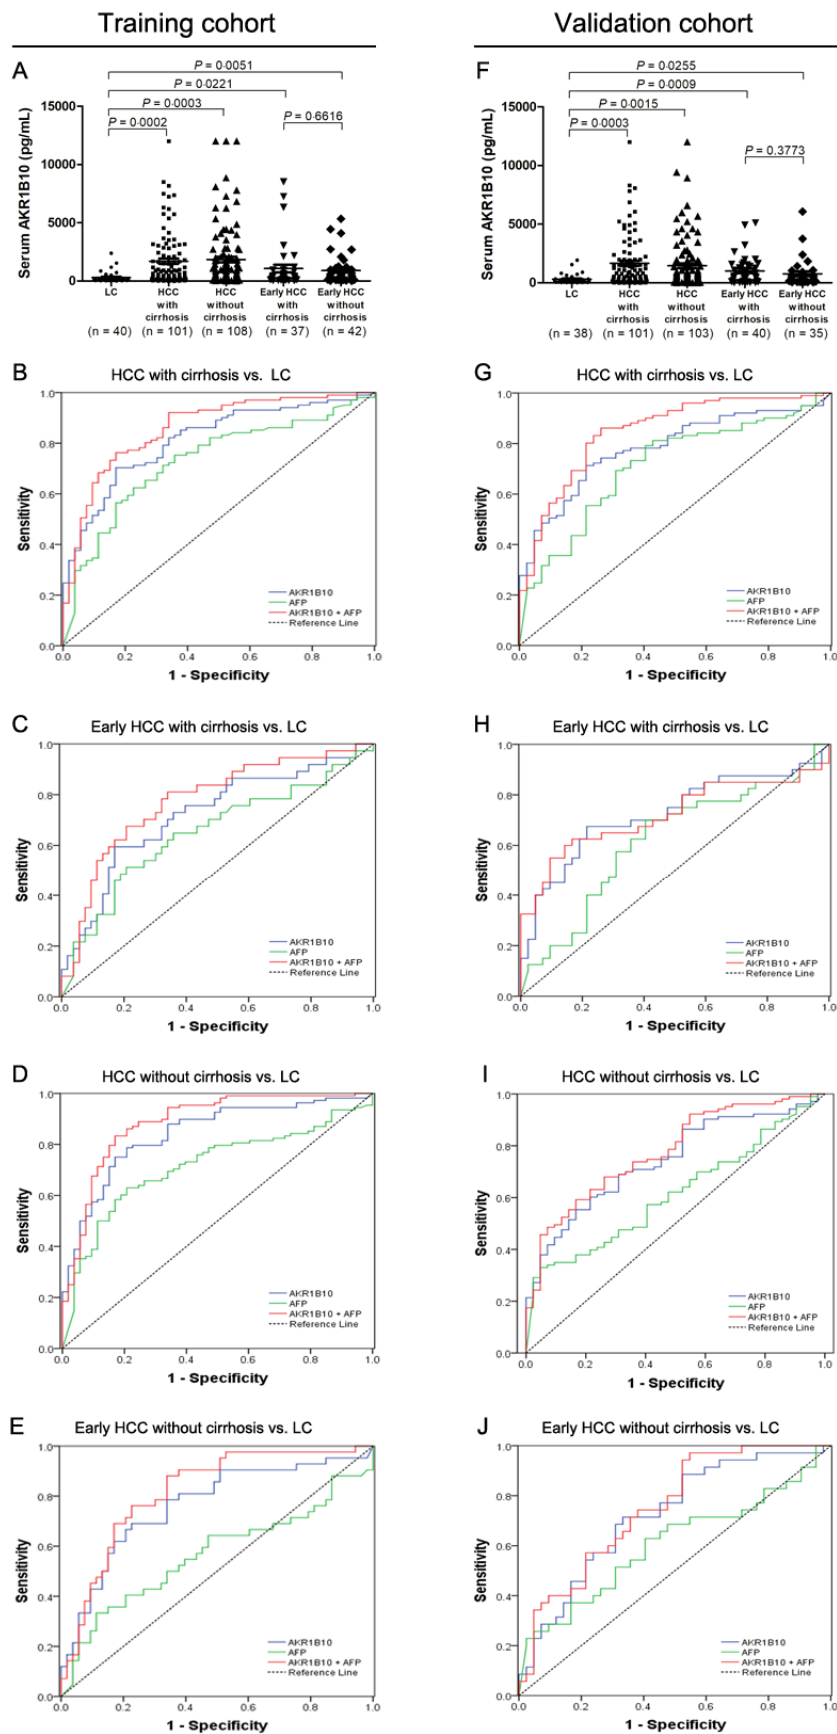

**Supporting FIG. S5.** Diagnostic accuracy of AKR1B10 in differentiating patients with HCC with or without cirrhosis from patients with LC. (A) Levels of AKR1B10 in patients with LC, patients with HCC with or without cirrhosis, and patients with early HCC with or without cirrhosis in training cohort. (B and C) ROC curve analyses of AKR1B10, AFP, or both in training cohort for patients with HCC with cirrhosis versus patients with LC and patients with early HCC with cirrhosis versus patients with LC, respectively. (D and E) ROC curve analyses of AKR1B10, AFP, or both in training cohort for patients with HCC without cirrhosis versus patients with LC and patients with early HCC without cirrhosis versus patients with LC. (F) Levels of AKR1B10 in patients with LC, patients with HCC with or without cirrhosis, and patients with early HCC with or without cirrhosis in validation cohort. (G and H) ROC curve analyses of AKR1B10, AFP, or both in validation cohort for patients with HCC with cirrhosis versus patients with LC and patients with early HCC with cirrhosis versus patients with LC, respectively. (I and J) ROC curve analyses of AKR1B10, AFP, or both in validation cohort for patients with HCC without cirrhosis versus patients with LC and patients with early HCC without cirrhosis versus patients with LC.



### A Total HCC

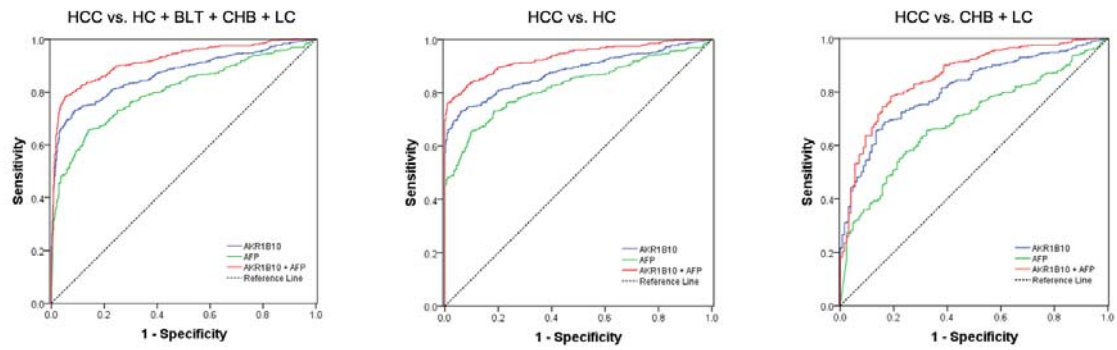

### B Total early HCC

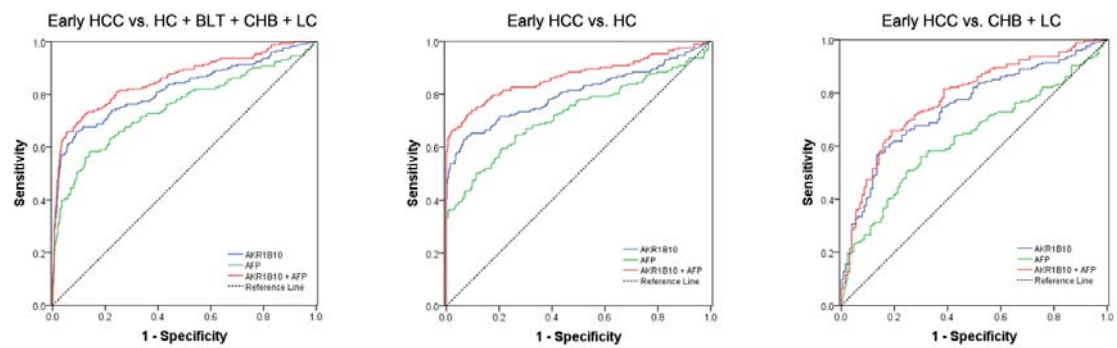

**Supporting FIG. S6.** Diagnostic accuracy of AKR1B10 in discrimination of patients with HCC from controls when participants in all three cohorts are combined. (A) ROC curves of AKR1B10, AFP, or both for total patients with HCC versus total controls, HCs, or high-risk controls (CHB + LC) from three cohorts. (B) ROC curves of AKR1B10, AFP, or both for total patients with early HCC versus total controls, HCs, or high-risk controls.

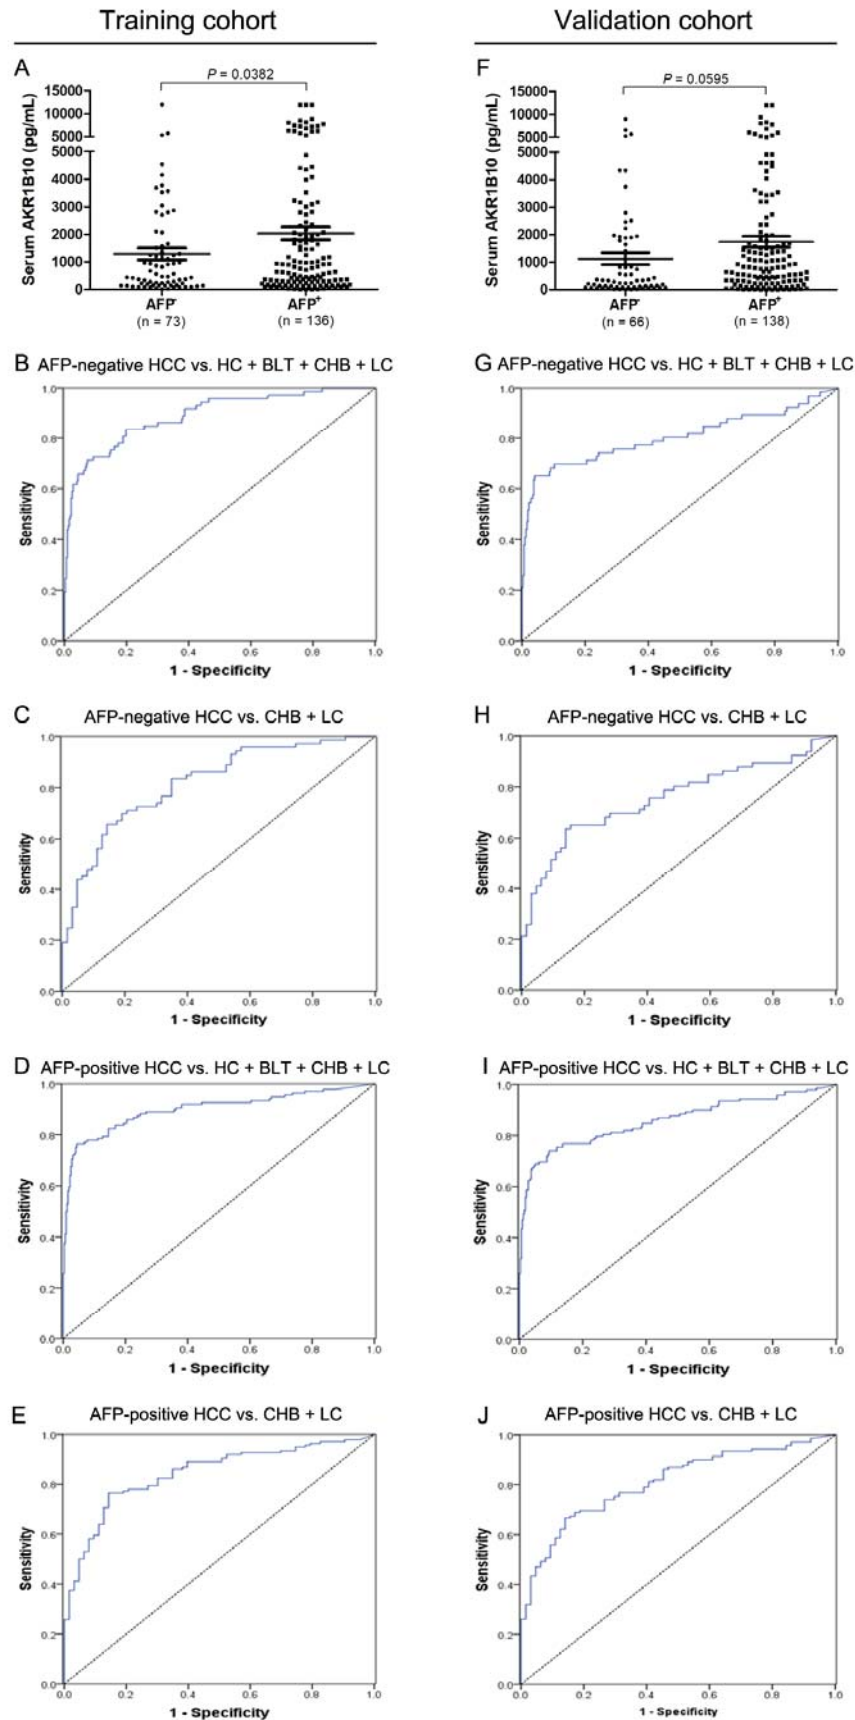

**Supporting FIG. S7. Diagnostic performance of AKR1B10 in AFP-negative or AFP-positive HCC.** (A) Levels of AKR1B10 in AFP-negative and AFP-positive patients with HCC in training cohort. (B and C) ROC curve analyses of AKR1B10 in AFP-negative patients with HCC versus all controls or versus high-risk controls (CHB + LC) in training cohort. (D and E) ROC curve analyses of AKR1B10 in AFP-positive patients with HCC versus all controls or versus high-risk controls in training cohort. (F) Levels of AKR1B10 in AFP-negative and AFP-positive patients with HCC in validation cohort. (G and H) ROC curve analyses of AKR1B10 in AFP-negative patients with HCC versus all controls or versus high-risk controls in validation cohort. (I and J) ROC curve analyses of AKR1B10 in AFP-positive patients with HCC versus all controls or versus high-risk controls in validation cohort.

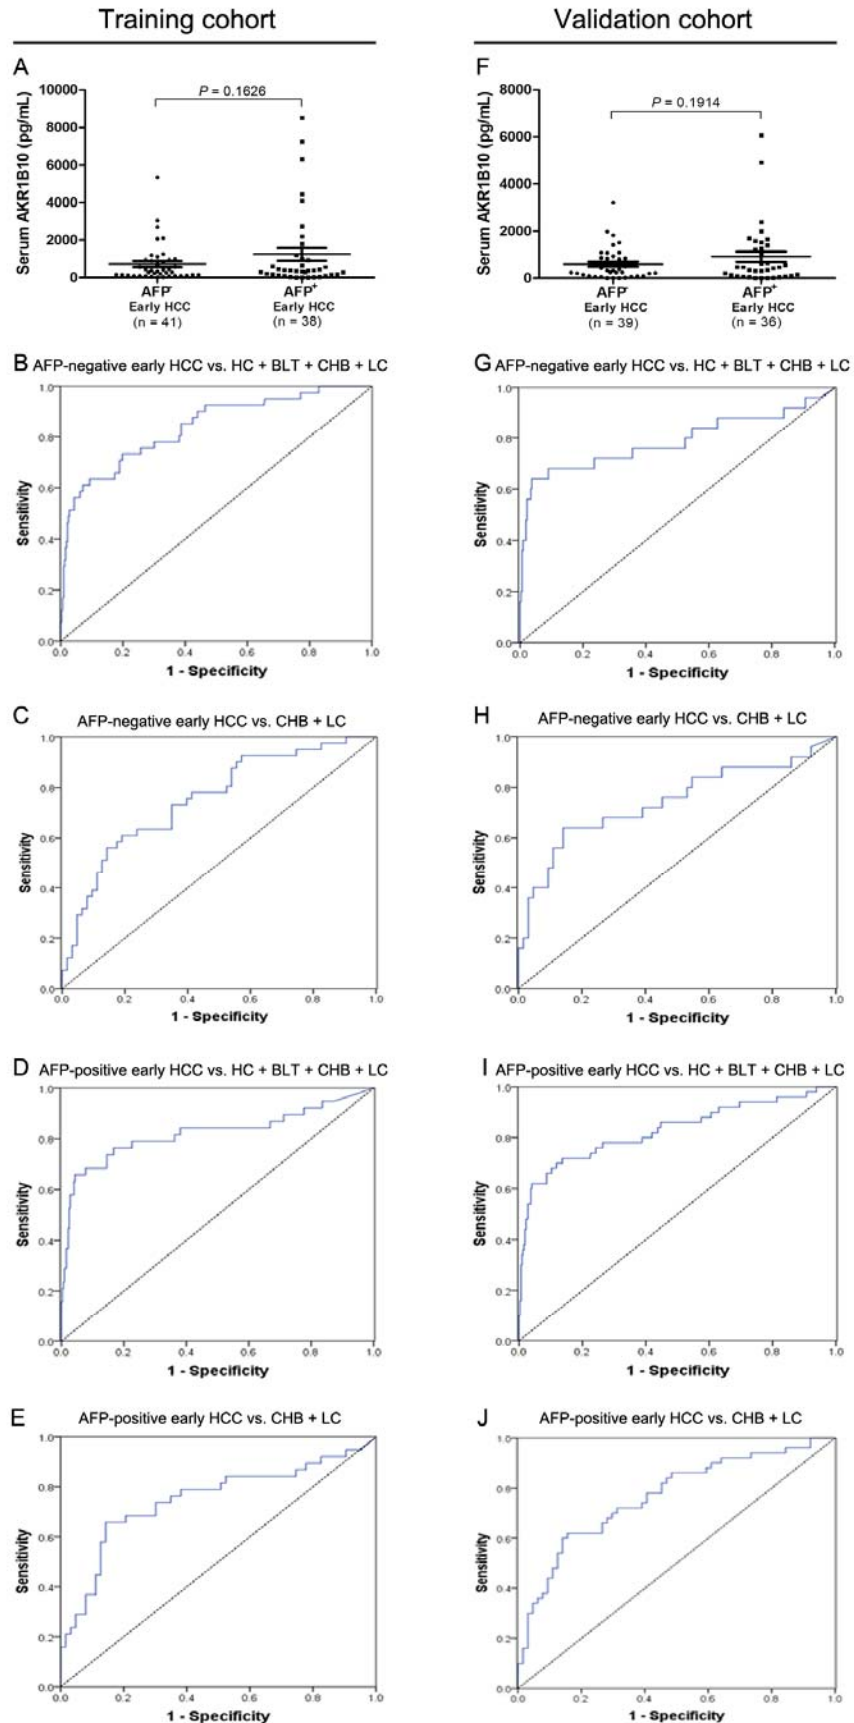

**Supporting FIG. S8.** Diagnostic performance of AKR1B10 in AFP-negative or AFP-positive patients with early HCC. (A) Levels of AKR1B10 in AFP-negative and AFP-positive patients with early HCC in training cohort. (B and C) ROC curve analyses of AKR1B10 in AFP-negative patients with early HCC versus all controls or versus high-risk controls (CHB + LC) in training cohort. (D and E) ROC curve analyses of AKR1B10 in AFP-positive patients with early HCC versus all controls or versus high-risk controls in training cohort. (F) Levels of AKR1B10 in AFP-negative and AFP-positive patients with early HCC in validation cohort. (G and H) ROC curve analyses of AKR1B10 in AFP-negative patients with early HCC versus all controls or versus high-risk controls (CHB + LC) in validation cohort. (I and J) ROC curve analyses of AKR1B10 in AFP-positive patients with early HCC versus all controls or versus high-risk controls in validation cohort.

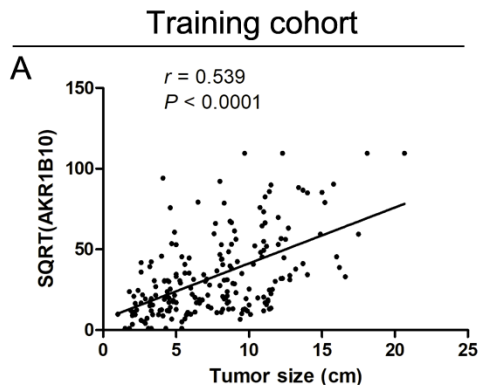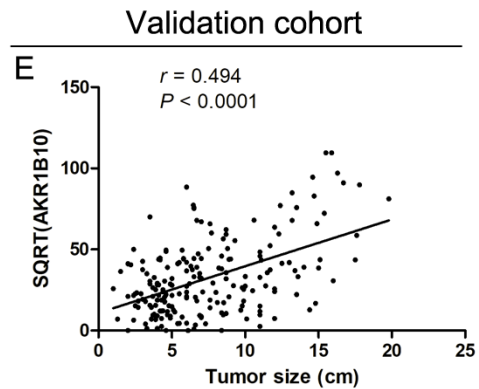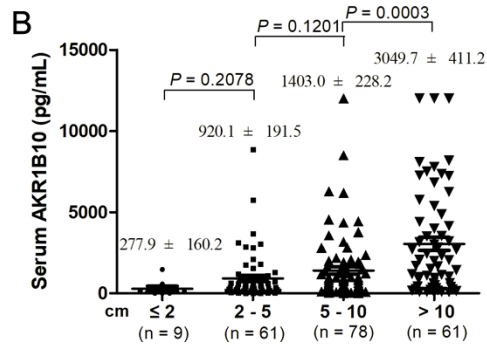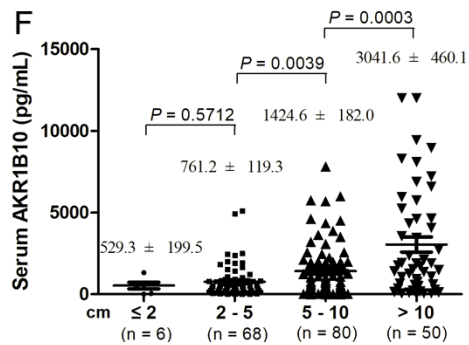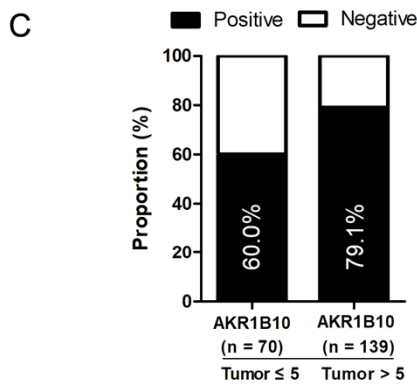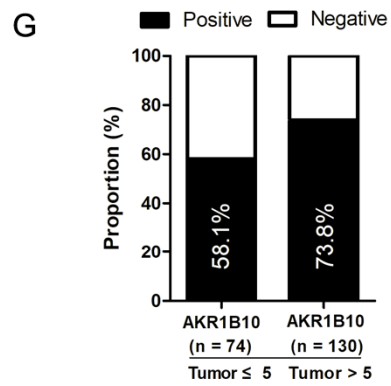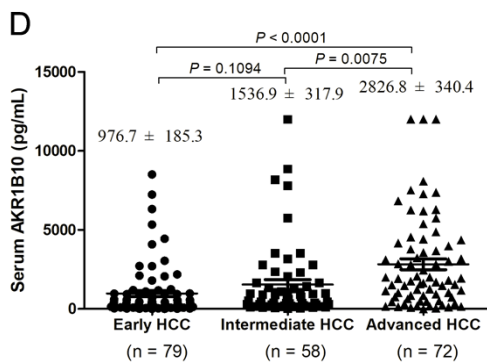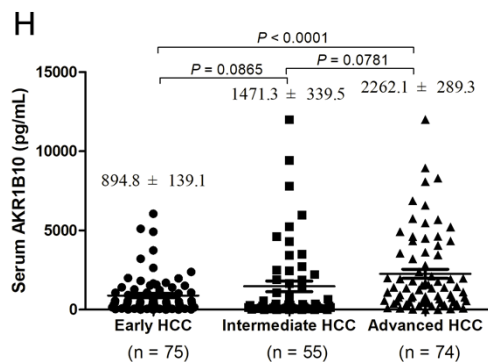

**Supporting FIG. S9.** Stratified analysis of serum AKR1B10 levels with tumor size and stages. (A) Linear regression analyses of AKR1B10 levels and tumor size in training cohort. (B) Levels of AKR1B10 in patients with HCC with different tumor sizes in training cohort. (C) Positive rates of AKR1B10 in patients with HCC with tumor size  $\leq 5$  cm or  $> 5$  cm in training cohort. (D) AKR1B10 levels in patients with HCC at different BCLC stages in training cohort. (E) Linear regression analyses of AKR1B10 levels and tumor size in validation cohort. (F) Levels of AKR1B10 in patients with HCC with different tumor sizes in validation cohort. (G) Positive rates of AKR1B10 in patients with HCC with tumor size  $\leq 5$  cm or  $> 5$  cm in validation cohort. (H) AKR1B10 levels in patients with HCC at different BCLC stages in validation cohort.

## **Supporting Tables**



## **Supporting TABLE S1. Eligibility criteria for selection of the participants.**

---

### **Hepatocellular carcinoma**

Inclusion criteria:

1. Age:  $\geq 18$  and  $\leq 80$  years, both male and female.
2. Diagnosed based on AFP serology and at least two imaging technologies (hepatic ultrasound, together with CT and/or MRI).
3. Confirmed histopathologically by two independent pathologists.
4. No preoperative chemotherapy, radiotherapy, transarterial chemoembolization, or ablation before collection of blood samples.
5. The subjects volunteer to sign the informed consent.

Exclusion criteria:

1. Patients with non-hepatocellular carcinoma (non-HCC).
2. Receiving any anticancer therapy before blood sample collection.
3. Pregnant or lactating women.
4. Those with clinical diagnosis of acute and chronic gastrointestinal diseases.
5. Those with fasting plasma glucose  $\geq 7.0$  mmol/L or casual plasma glucose  $\geq 11.1$  mmol/L.
6. Those with human immunodeficiency virus (HIV) infection or acquired immune deficiency syndrome (AIDS)-associated diseases.
7. Conditions that are considered not suitable for this study.

### **Healthy control**

1. Age:  $\geq 18$  and  $\leq 80$  years, both male and female.
2. Serologically negative for hepatitis viruses (hepatitis B surface antigen [HBsAg], hepatitis B e antigen [HBeAg], anti-HBe, and anti-HBc).
3. No diabetes, no liver and gastrointestinal diseases, and no liver malignancies.
4. No history of other systematic malignancies.

### **Benign liver tumor**

1. Age:  $\geq 18$  and  $\leq 80$  years, both male and female.
2. Hepatic hemangioma.
3. Focal nodular hyperplasia.
4. Hepatic adenoma.

### **Chronic hepatitis B**

1. Age:  $\geq 18$  and  $\leq 80$  years, both male and female.
2. HBsAg-positive  $>6$  months.
3. Serum HBV DNA  $> 10^5$  copies/mL.
4. Persistent or intermittent elevation in AST or ALT levels.

### **Liver cirrhosis**

1. Age:  $\geq 18$  and  $\leq 80$  years, both male and female.
2. With chronic hepatitis B infection history  $< 20$  years.

3. Liver biopsy indicates cirrhosis and liver function detection indicates compensated phase of liver cirrhosis.

4. If no biopsy available, diagnosis must be supported by two imaging technologies.

**Supporting TABLE 2. Characteristics of the subjects enrolled in each cohort.**

| Characteristics                   | n   | Age<br>(years)  | Gender<br>(M/F) | AFP<br>(ng/mL)    | HBsAg-<br>Positive | Cirrhosis | AST<br>(U/L)      | ALT<br>(U/L)      | TBIL<br>( $\mu$ mol/L) | PT (s)         | Albumin<br>(g/L) | Tumor Number |          | Tumor Size (cm) |     |      |      |
|-----------------------------------|-----|-----------------|-----------------|-------------------|--------------------|-----------|-------------------|-------------------|------------------------|----------------|------------------|--------------|----------|-----------------|-----|------|------|
|                                   |     |                 |                 |                   |                    |           |                   |                   |                        |                |                  | Single       | Multiple | $\leq 2$        | 2-5 | 5-10 | > 10 |
| <b>Discover cohort—ACHXSM CSU</b> |     |                 |                 |                   |                    |           |                   |                   |                        |                |                  |              |          |                 |     |      |      |
| HC                                | 66  | 50.3 $\pm$ 13.1 | 45/21           | 9.7 $\pm$ 17.3    | -                  | -         | 18.4 $\pm$ 6.3    | 19.5 $\pm$ 7.1    | 13.7 $\pm$ 6.0         | -              | 46.3 $\pm$ 2.5   | -            | -        | -               | -   | -    | -    |
| HCC                               | 69  | 53.8 $\pm$ 11.1 | 58/11           | 436.7 $\pm$ 504.9 | 63                 | 38        | 61.7 $\pm$ 49.9   | 44.3 $\pm$ 38.4   | 16.7 $\pm$ 7.9         | 13.0 $\pm$ 1.6 | 36.1 $\pm$ 4.0   | 28           | 41       | 3               | 11  | 35   | 20   |
| <b>Training cohort—ACHXSM CSU</b> |     |                 |                 |                   |                    |           |                   |                   |                        |                |                  |              |          |                 |     |      |      |
| HC                                | 203 | 50.7 $\pm$ 11.0 | 128/75          | 9.1 $\pm$ 16.9    | -                  | -         | 21.2 $\pm$ 7.1    | 20.4 $\pm$ 6.2    | 13.9 $\pm$ 5.6         | -              | 47.6 $\pm$ 3.9   | -            | -        | -               | -   | -    | -    |
| HCC                               | 209 | 54.1 $\pm$ 12.0 | 186/23          | 400.2 $\pm$ 503.4 | 195                | 101       | 72.9 $\pm$ 66.5   | 49.9 $\pm$ 35.3   | 21.9 $\pm$ 20.1        | 13.7 $\pm$ 1.5 | 37.1 $\pm$ 5.1   | 111          | 98       | 9               | 61  | 78   | 61   |
| BLT                               | 57  | 47.7 $\pm$ 9.8  | 22/35           | 6.4 $\pm$ 8.1     | 26                 | 6         | 29.0 $\pm$ 35.1   | 19.6 $\pm$ 20.1   | 12.7 $\pm$ 4.4         | 12.7 $\pm$ 1.1 | 46.3 $\pm$ 2.5   | 37           | 20       | 7               | 11  | 30   | 9    |
| CHB                               | 10  | 44.1 $\pm$ 12.9 | 5/5             | 53.9 $\pm$ 72.4   | 10                 | -         | 172.4 $\pm$ 214.3 | 270.1 $\pm$ 265.1 | 32.8 $\pm$ 31.3        | 11.9 $\pm$ 1.4 | 41.6 $\pm$ 5.3   | -            | -        | -               | -   | -    | -    |
| LC                                | 40  | 54.5 $\pm$ 9.8  | 32/17           | 123.4 $\pm$ 295.4 | 33                 | 40        | 125.9 $\pm$ 162.4 | 111.4 $\pm$ 188.8 | 30.8 $\pm$ 20.2        | 13.7 $\pm$ 2.3 | 35.5 $\pm$ 6.3   | -            | -        | -               | -   | -    | -    |
| <b>Validation cohort</b>          |     |                 |                 |                   |                    |           |                   |                   |                        |                |                  |              |          |                 |     |      |      |
| <b>ACHXSM CSU</b>                 |     |                 |                 |                   |                    |           |                   |                   |                        |                |                  |              |          |                 |     |      |      |
| HC                                | 75  | 49.6 $\pm$ 10.4 | 47/28           | 13.3 $\pm$ 24.7   | -                  | -         | 20.1 $\pm$ 5.5    | 18.7 $\pm$ 7.4    | 14.2 $\pm$ 5.8         | -              | 48.1 $\pm$ 3.4   | -            | -        | -               | -   | -    | -    |
| HCC                               | 71  | 52.8 $\pm$ 11.2 | 60/11           | 390.8 $\pm$ 501.9 | 59                 | 38        | 56.7 $\pm$ 43.1   | 49.8 $\pm$ 36.5   | 22.4 $\pm$ 24.8        | 13.2 $\pm$ 1.5 | 39.3 $\pm$ 4.8   | 45           | 26       | 2               | 25  | 28   | 16   |
| BLT                               | 20  | 54.7 $\pm$ 12.8 | 11/9            | 11.5 $\pm$ 16.8   | 7                  | 2         | 35.5 $\pm$ 44.6   | 24.2 $\pm$ 25.5   | 15.1 $\pm$ 6.6         | 12.7 $\pm$ 1.0 | 40.2 $\pm$ 4.7   | 6            | 14       | 0               | 7   | 11   | 2    |
| LC                                | 10  | 55.6 $\pm$ 13.6 | 7/3             | 115.9 $\pm$ 124.8 | 7                  | 10        | 117.3 $\pm$ 120.5 | 94.2 $\pm$ 92.7   | 29.1 $\pm$ 17.0        | 12.7 $\pm$ 1.2 | 41.1 $\pm$ 4.9   | -            | -        | -               | -   | -    | -    |
| <b>HPPH</b>                       |     |                 |                 |                   |                    |           |                   |                   |                        |                |                  |              |          |                 |     |      |      |
| HC                                | 63  | 51.2 $\pm$ 12.3 | 36/27           | 12.3 $\pm$ 21.4   | -                  | -         | 22.3 $\pm$ 4.9    | 20.6 $\pm$ 6.1    | 13.7 $\pm$ 4.6         | -              | 47.2 $\pm$ 3.1   | -            | -        | -               | -   | -    | -    |
| HCC                               | 64  | 54.4 $\pm$ 9.9  | 54/10           | 386.7 $\pm$ 493.7 | 60                 | 30        | 65.1 $\pm$ 50.9   | 68.7 $\pm$ 52.1   | 28.7 $\pm$ 32.4        | 13.5 $\pm$ 1.7 | 37.2 $\pm$ 4.9   | 37           | 27       | 0               | 21  | 29   | 14   |
| BLT                               | 18  | 52.2 $\pm$ 11.7 | 7/11            | 10.7 $\pm$ 14.8   | 5                  | 1         | 46.4 $\pm$ 49.1   | 39.7 $\pm$ 33.7   | 11.4 $\pm$ 3.4         | 12.3 $\pm$ 0.9 | 40.2 $\pm$ 2.6   | 5            | 13       | 0               | 4   | 9    | 5    |
| CHB                               | 9   | 40.3 $\pm$ 14.5 | 6/3             | 76.9 $\pm$ 182.1  | 6                  | -         | 251.6 $\pm$ 248.5 | 372.4 $\pm$ 179.3 | 31.8 $\pm$ 35.7        | 12.5 $\pm$ 1.2 | 43.2 $\pm$ 6.8   | -            | -        | -               | -   | -    | -    |
| LC                                | 13  | 54.9 $\pm$ 10.9 | 7/6             | 148.0 $\pm$ 263.8 | 8                  | 13        | 129.0 $\pm$ 223.7 | 114.7 $\pm$ 247.9 | 22.5 $\pm$ 14.1        | 12.0 $\pm$ 1.6 | 37.8 $\pm$ 6.3   | -            | -        | -               | -   | -    | -    |
| <b>FAH NUSM</b>                   |     |                 |                 |                   |                    |           |                   |                   |                        |                |                  |              |          |                 |     |      |      |

|     |    |             |       |               |    |    |               |               |             |            |            |    |    |   |    |    |    |
|-----|----|-------------|-------|---------------|----|----|---------------|---------------|-------------|------------|------------|----|----|---|----|----|----|
| HC  | 70 | 52.9 ± 9.7  | 38/32 | 13.4 ± 22.5   | -  | -  | 19.1 ± 7.3    | 21.4 ± 5.2    | 12.3 ± 2.6  | -          | 45.8 ± 4.9 | -  | -  | - | -  | -  | -  |
| HCC | 69 | 53.3 ± 11.3 | 57/12 | 397.7 ± 514.5 | 63 | 33 | 75.6 ± 69.7   | 57.0 ± 43.5   | 22.1 ± 25.9 | 13.3 ± 2.2 | 36.8 ± 5.9 | 43 | 26 | 4 | 22 | 23 | 20 |
| BLT | 12 | 59.2 ± 17.7 | 5/7   | 11.8 ± 15.6   | 3  | 0  | 38.0 ± 29.5   | 36.9 ± 16.7   | 14.3 ± 5.3  | 13.6 ± 1.3 | 39.2 ± 7.0 | 3  | 9  | 0 | 8  | 3  | 1  |
| CHB | 13 | 41.0 ± 13.9 | 8/5   | 87.9 ± 224.9  | 9  | -  | 232.7 ± 236.6 | 456.7 ± 466.5 | 35.5 ± 32.2 | 12.0 ± 1.6 | 41.8 ± 5.1 | -  | -  | - | -  | -  | -  |
| LC  | 15 | 55.7 ± 10.4 | 9/6   | 133.7 ± 315.1 | 10 | 15 | 123.2 ± 89.0  | 108.5 ± 126.9 | 36.1 ± 18.0 | 12.7 ± 2.3 | 36.8 ± 6.0 | -  | -  | - | -  | -  | -  |

-, Not Available (NA).

Abbreviations: ACHXSM CSU, Affiliated Cancer Hospital of Xiangya School of Medicine, Central South University; ALT, alanine aminotransferase; AST, aspartate transaminase; FAH NUSM, First Affiliated Hospital, Nanhua University School of Medicine; HPPH, Hunan Provincial People's Hospital; PT, prothrombin time; TBIL, total bilirubin. Data are presented as the mean ± SD.

**Supporting TABLE 3. Information of the excluded patients in each center.**

| Characteristics | n  | Age (years)     | Gender (M/F) | AFP (ng/mL)       | HBsAg-Positive | Cirrhosis | AST (U/L)       | ALT (U/L)        | TBIL ( $\mu$ mol/L) | PT (s)         | Albumin (g/L)  | Main Excluded Reasons                                                                                  |
|-----------------|----|-----------------|--------------|-------------------|----------------|-----------|-----------------|------------------|---------------------|----------------|----------------|--------------------------------------------------------------------------------------------------------|
| ACHXSM CSU      | 33 | 56.7 $\pm$ 10.7 | 19/14        | 127.5 $\pm$ 225.8 | 18             | 12        | 46.6 $\pm$ 44.7 | 52.1 $\pm$ 140.3 | 21.5 $\pm$ 37.7     | 13.6 $\pm$ 1.4 | 36.9 $\pm$ 5.2 | ICC, other tumor history, anticancer therapy before blood collection, severe gastrointestinal diseases |
| HPPH            | 7  | 55.0 $\pm$ 13.6 | 3/4          | 123.0 $\pm$ 150.2 | 3              | 2         | 33.3 $\pm$ 15.1 | 30.6 $\pm$ 19.5  | 27.8 $\pm$ 37.1     | 12.8 $\pm$ 1.0 | 37.8 $\pm$ 3.2 | ICC, other tumor history, severe gastrointestinal diseases                                             |
| FAH NUSM        | 8  | 60.4 $\pm$ 12.6 | 6/2          | 153.7 $\pm$ 204.5 | 4              | 4         | 41.8 $\pm$ 22.8 | 35.5 $\pm$ 19.8  | 36.5 $\pm$ 58.7     | 13.2 $\pm$ 1.3 | 37.9 $\pm$ 2.9 | ICC, other tumor history, anticancer therapy before blood collection                                   |

Abbreviations: ACHXSM CSU, Affiliated Cancer Hospital of Xiangya School of Medicine, Central South University; ALT, alanine aminotransferase; AST, aspartate aminotransferase; FAH NUSM, First Affiliated Hospital, Nanhua University School of Medicine; HPPH, Hunan Provincial People's Hospital; ICC, intrahepatic cholangiocarcinoma; PT, prothrombin time; TBIL, total bilirubin. Data are presented as the mean  $\pm$  SD.

**Supporting TABLE 4. Clinicopathological characteristics of patients with HCC in training and validation cohorts.**

| Variable                  | Training Cohort (n = 209) |                | Validation Cohort (n = 204) |                | P Value |       |
|---------------------------|---------------------------|----------------|-----------------------------|----------------|---------|-------|
|                           | no.                       | Percentage (%) | no.                         | Percentage (%) |         |       |
| Gender                    |                           |                |                             |                |         |       |
|                           | Female                    | 23             | 11.00                       | 33             | 16.18   | 0.125 |
|                           | Male                      | 186            | 89.00                       | 171            | 83.82   |       |
| Age (years)               |                           |                |                             |                |         |       |
|                           | ≤ 55                      | 108            | 51.67                       | 117            | 57.35   | 0.247 |
|                           | > 55                      | 101            | 48.33                       | 87             | 42.65   |       |
| HBsAg                     |                           |                |                             |                |         |       |
|                           | Negative                  | 14             | 6.70                        | 22             | 10.78   | 0.141 |
|                           | Positive                  | 195            | 93.30                       | 182            | 89.22   |       |
| AFP (ng/mL)               |                           |                |                             |                |         |       |
|                           | ≤ 20                      | 73             | 34.93                       | 66             | 32.35   | 0.580 |
|                           | > 20                      | 136            | 65.07                       | 138            | 67.65   |       |
| ALT (U/L)                 |                           |                |                             |                |         |       |
|                           | ≤ 40                      | 102            | 48.80                       | 114            | 55.88   | 0.150 |
|                           | > 40                      | 107            | 51.20                       | 90             | 44.12   |       |
| AST (U/L)                 |                           |                |                             |                |         |       |
|                           | ≤ 40                      | 80             | 38.28                       | 96             | 47.06   | 0.071 |
|                           | > 40                      | 129            | 61.72                       | 108            | 52.94   |       |
| Cirrhosis                 |                           |                |                             |                |         |       |
|                           | No                        | 108            | 51.67                       | 103            | 50.49   | 0.810 |
|                           | Yes                       | 101            | 48.33                       | 101            | 49.51   |       |
| Tumor size (range, cm)    |                           |                |                             |                |         |       |
|                           | ≤ 5                       | 71             | 33.49                       | 71             | 34.80   | 0.859 |
|                           | > 5                       | 138            | 66.51                       | 133            | 65.20   |       |
| Tumor number              |                           |                |                             |                |         |       |
|                           | Single                    | 111            | 53.11                       | 125            | 61.27   | 0.094 |
|                           | Multiple                  | 98             | 46.89                       | 79             | 38.73   |       |
| Vascular invasion         |                           |                |                             |                |         |       |
|                           | No                        | 144            | 68.90                       | 128            | 62.75   | 0.743 |
|                           | Yes                       | 65             | 31.10                       | 62             | 30.39   |       |
|                           | Missing                   |                |                             | 14             | 6.86    |       |
| Child-Pugh classification |                           |                |                             |                |         |       |
|                           | A                         | 161            | 77.03                       | 160            | 78.43   | 0.733 |
|                           | B + C                     | 48             | 22.97                       | 44             | 21.57   |       |
| Tumor differentiation     |                           |                |                             |                |         |       |
|                           | I-II                      | 111            | 49.76                       | 117            | 57.35   | 0.807 |
|                           | III-IV                    | 69             | 36.36                       | 69             | 33.82   |       |
|                           | Missing                   | 29             | 13.88                       | 18             | 8.82    |       |
| BCLC stage                |                           |                |                             |                |         |       |
|                           | 0 + A                     | 79             | 37.80                       | 75             | 36.76   | 0.828 |
|                           | B + C + D                 | 130            | 62.20                       | 129            | 63.24   |       |
| TNM stage                 |                           |                |                             |                |         |       |
|                           | I-II                      | 86             | 41.15                       | 92             | 45.10   | 0.144 |
|                           | III-IV                    | 123            | 58.85                       | 98             | 48.04   |       |
|                           | Missing                   |                |                             | 14             | 6.86    |       |

**Supporting TABLE 5. Distribution of serum AKR1B10 concentrations of HCC and controls in training and validation cohorts.**

| Serum AKR1B10 (pg/mL) | Training Cohort |               |              |              |              | Validation Cohort |               |              |              |              |
|-----------------------|-----------------|---------------|--------------|--------------|--------------|-------------------|---------------|--------------|--------------|--------------|
|                       | HC              | HCC           | BLT          | CHB          | LC           | HC                | HCC           | BLT          | CHB          | LC           |
|                       | (n = 203) (%)   | (n = 209) (%) | (n = 57) (%) | (n = 10) (%) | (n = 40) (%) | (n = 208) (%)     | (n = 204) (%) | (n = 50) (%) | (n = 22) (%) | (n = 38) (%) |
| 0~268                 | 198 (97.54)     | 57 (27.27)    | 57 (100)     | 10 (100)     | 31 (77.50)   | 201 (96.63)       | 65 (31.86)    | 48 (96.00)   | 19 (86.36)   | 27 (71.05)   |
| 269~500               | 5 (2.46)        | 35 (16.75)    | 0            | 0            | 3 (7.50)     | 7 (3.37)          | 28 (13.73)    | 2 (4.00)     | 3 (13.64)    | 4 (10.53)    |
| 501~750               | 0               | 12 (5.74)     | 0            | 0            | 2 (5.00)     | 0                 | 14 (6.86)     | 0            | 0            | 3 (7.89)     |
| 751~1000              | 0               | 19 (9.09)     | 0            | 0            | 1 (2.50)     | 0                 | 15 (7.35)     | 0            | 0            | 2 (5.26)     |
| 1001~1500             | 0               | 16 (7.66)     | 0            | 0            | 1 (2.50)     | 0                 | 18 (8.82)     | 0            | 0            | 0            |
| 1501~2000             | 0               | 13 (6.22)     | 0            | 0            | 1 (2.50)     | 0                 | 20 (9.80)     | 0            | 0            | 2 (5.26)     |
| 2001~3000             | 0               | 16 (7.66)     | 0            | 0            | 1 (2.50)     | 0                 | 9 (4.41)      | 0            | 0            | 0            |
| 3001~6000             | 0               | 23 (11.00)    | 0            | 0            | 0            | 0                 | 25 (12.25)    | 0            | 0            | 0            |
| > 6000                | 0               | 18 (8.61)     | 0            | 0            | 0            | 0                 | 10 (4.90)     | 0            | 0            | 0            |

**Supporting TABLE 6. Association between AKR1B10 and clinicopathological data of HCC in training and validation cohorts. Serum AKR1B10 Cutoff: 267.9 pg/mL.**

| Variable                  | Training Cohort (n = 209) |          | P value | Validation Cohort (n = 204) |          | P value |
|---------------------------|---------------------------|----------|---------|-----------------------------|----------|---------|
|                           | Negative                  | Positive |         | Negative                    | Positive |         |
|                           | 57                        | 152      |         | 65                          | 139      |         |
| Gender                    |                           |          |         |                             |          |         |
| Female                    | 5                         | 18       | 0.528   | 13                          | 20       | 0.311   |
| Male                      | 52                        | 134      |         | 52                          | 119      |         |
| Age (years)               |                           |          |         |                             |          |         |
| ≤ 55                      | 35                        | 73       | 0.085   | 39                          | 78       | 0.601   |
| > 55                      | 22                        | 79       |         | 26                          | 61       |         |
| HBsAg                     |                           |          |         |                             |          |         |
| Negative                  | 2                         | 12       | 0.359   | 11                          | 11       | 0.053   |
| Positive                  | 55                        | 140      |         | 54                          | 128      |         |
| AFP (ng/mL)               |                           |          |         |                             |          |         |
| ≤ 20                      | 26                        | 47       | 0.047   | 34                          | 32       | 0.001   |
| > 20                      | 31                        | 105      |         | 31                          | 107      |         |
| ALT (U/L)                 |                           |          |         |                             |          |         |
| ≤ 40                      | 36                        | 66       | 0.011   | 45                          | 69       | 0.009   |
| > 40                      | 21                        | 86       |         | 20                          | 70       |         |
| AST (U/L)                 |                           |          |         |                             |          |         |
| ≤ 40                      | 36                        | 44       | 0.001   | 41                          | 55       | 0.002   |
| > 40                      | 21                        | 108      |         | 24                          | 84       |         |
| Cirrhosis                 |                           |          |         |                             |          |         |
| No                        | 27                        | 81       | 0.446   | 39                          | 64       | 0.063   |
| Yes                       | 30                        | 71       |         | 26                          | 75       |         |
| Tumor size (range, cm)    |                           |          |         |                             |          |         |
| ≤ 5                       | 28                        | 42       | 0.003   | 31                          | 43       | 0.020   |
| > 5                       | 29                        | 110      |         | 34                          | 96       |         |
| Tumor number              |                           |          |         |                             |          |         |
| Single                    | 31                        | 80       | 0.821   | 45                          | 80       | 0.111   |
| Multiple                  | 26                        | 72       |         | 20                          | 59       |         |
| Vascular invasion         |                           |          |         |                             |          |         |
| No                        | 38                        | 106      | 0.669   | 44                          | 84       | 0.098   |
| Yes                       | 19                        | 46       |         | 14                          | 48       |         |
| Missing                   |                           |          |         | 7                           | 7        |         |
| Child-Pugh classification |                           |          |         |                             |          |         |
| A                         | 41                        | 120      | 0.283   | 53                          | 107      | 0.461   |
| B + C                     | 16                        | 32       |         | 12                          | 32       |         |
| Tumor differentiation     |                           |          |         |                             |          |         |
| I-II                      | 27                        | 84       | 0.268   | 45                          | 76       | 0.047   |
| III-IV                    | 22                        | 47       |         | 16                          | 53       |         |
| Missing                   | 8                         | 21       |         | 4                           | 10       |         |
| BCLC stage                |                           |          |         |                             |          |         |
| 0 + A                     | 31                        | 48       | 0.002   | 28                          | 47       | 0.201   |
| B + C + D                 | 26                        | 104      |         | 37                          | 92       |         |
| TNM stage                 |                           |          |         |                             |          |         |
| I-II                      | 22                        | 64       | 0.646   | 25                          | 67       | 0.206   |
| III-IV                    | 35                        | 88       |         | 35                          | 63       |         |
| Missing                   |                           |          |         | 5                           | 9        |         |



**Supporting TABLE 7. Parameters of AKR1B10 in differentiating HCC from HC, BLT, CHB, or LC controls.**

|                                | Training Cohort |             |       |       |          |          |                     | Validation Cohort |             |       |       |          |          |                     |
|--------------------------------|-----------------|-------------|-------|-------|----------|----------|---------------------|-------------------|-------------|-------|-------|----------|----------|---------------------|
|                                | Sensitivity     | Specificity | PPV   | NPV   | Positive | Negative | AUC (95%CI)         | Sensitivity       | Specificity | PPV   | NPV   | Positive | Negative | AUC (95%CI)         |
|                                | (%)             | (%)         | (%)   | (%)   | LR       | LR       |                     | (%)               | (%)         | (%)   | (%)   | LR       | LR       |                     |
| <b>HCC vs. HC</b>              |                 |             |       |       |          |          |                     |                   |             |       |       |          |          |                     |
| AKR1B10                        | 71.3%           | 96.1%       | 94.9% | 76.5% | 18.29    | 0.30     | 0.892 (0.858-0.920) | 72.5%             | 94.2%       | 92.5% | 77.8% | 12.58    | 0.29     | 0.850 (0.811-0.883) |
| AFP                            | 65.1%           | 91.6%       | 91.3% | 72.2% | 7.76     | 0.37     | 0.838 (0.799-0.873) | 73.5%             | 78.8%       | 77.3% | 75.2% | 3.48     | 0.34     | 0.814 (0.773-0.850) |
| AKR1B10 + AFP                  | 79.0%           | 95.0%       | 96.5% | 81.7% | 15.71    | 0.22     | 0.935 (0.907-0.957) | 74.0%             | 98.6%       | 98.1% | 79.5% | 51.32    | 0.26     | 0.910 (0.878-0.936) |
| <b>Early-stage HCC vs. HC</b>  |                 |             |       |       |          |          |                     |                   |             |       |       |          |          |                     |
| AKR1B10                        | 70.9%           | 83.7%       | 62.9% | 88.1% | 4.36     | 0.35     | 0.806 (0.755-0.851) | 68.0%             | 94.2%       | 81.0% | 89.1% | 11.79    | 0.34     | 0.826 (0.776-0.868) |
| AFP                            | 59.5%           | 83.3%       | 58.0% | 84.1% | 3.55     | 0.49     | 0.744 (0.689-0.794) | 65.3%             | 83.7%       | 59.0% | 87.0% | 4.00     | 0.41     | 0.757 (0.703-0.806) |
| AKR1B10 + AFP                  | 76.0%           | 87.2%       | 69.8% | 90.3% | 5.93     | 0.28     | 0.866 (0.821-0.904) | 70.7%             | 90.9%       | 73.6% | 89.6% | 7.74     | 0.32     | 0.838 (0.790-0.879) |
| <b>HCC vs. BLT</b>             |                 |             |       |       |          |          |                     |                   |             |       |       |          |          |                     |
| AKR1B10                        | 68.0%           | 91.83       | 75.0% | 88.8% | 8.32     | 0.35     | 0.796 (0.744-0.841) | 71.1%             | 98.0%       | 99.3% | 45.4% | 35.54    | 0.30     | 0.885 (0.839-0.922) |
| AFP                            | 65.3%           | 74.04       | 47.6% | 85.6% | 2.52     | 0.47     | 0.697 (0.640-0.750) | 64.2%             | 96.0%       | 98.5% | 39.7% | 16.05    | 0.37     | 0.841 (0.790-0.884) |
| AKR1B10 + AFP                  | 70.7%           | 97.60       | 91.4% | 90.2% | 29.40    | 0.30     | 0.872 (0.827-0.908) | 88.7%             | 98.0%       | 99.5% | 68.1% | 44.36    | 0.12     | 0.956 (0.922-0.977) |
| <b>Early-stage HCC vs. BLT</b> |                 |             |       |       |          |          |                     |                   |             |       |       |          |          |                     |
| AKR1B10                        | 60.7%           | 96.4%       | 96.0% | 64.0% | 17.32    | 0.41     | 0.833 (0.760-0.892) | 69.3%             | 90.0%       | 91.2% | 66.2% | 6.93     | 0.34     | 0.836 (0.759-0.896) |
| AFP                            | 75.9%           | 71.9%       | 78.9% | 68.3% | 2.71     | 0.33     | 0.791 (0.713-0.856) | 48.0%             | 96.0%       | 94.7% | 55.2% | 12.00    | 0.54     | 0.757 (0.672-0.829) |
| AKR1B10 + AFP                  | 75.9%           | 98.3%       | 98.4% | 74.7% | 43.29    | 0.24     | 0.892 (0.827-0.939) | 77.3%             | 94.0%       | 95.1% | 73.4% | 12.89    | 0.24     | 0.903 (0.838-0.949) |
| <b>HCC vs. CHB</b>             |                 |             |       |       |          |          |                     |                   |             |       |       |          |          |                     |

|                                |       |       |       |       |      |      |                     |       |       |       |       |       |      |                     |
|--------------------------------|-------|-------|-------|-------|------|------|---------------------|-------|-------|-------|-------|-------|------|---------------------|
| AKR1B10                        | 73.2% | 90.0% | 99.4% | 13.8% | 7.32 | 0.30 | 0.869 (0.817-0.911) | 67.6% | 95.5% | 99.3% | 24.1% | 14.88 | 0.34 | 0.848 (0.795-0.892) |
| AFP                            | 38.3% | 90.0% | 98.8% | 6.5%  | 3.83 | 0.69 | 0.661 (0.595-0.724) | 67.6% | 77.3% | 96.5% | 20.5% | 2.98  | 0.42 | 0.716 (0.652-0.774) |
| AKR1B10 + AFP                  | 77.5% | 90.0% | 99.4% | 16.1% | 7.75 | 0.25 | 0.904 (0.857-0.940) | 72.1% | 90.9% | 98.7% | 26.0% | 7.93  | 0.31 | 0.878 (0.828-0.918) |
| <b>Early-stage HCC vs. CHB</b> |       |       |       |       |      |      |                     |       |       |       |       |       |      |                     |
| AKR1B10                        | 62.0% | 90.0% | 98.0% | 23.1% | 6.20 | 0.42 | 0.792 (0.693-0.871) | 62.7% | 81.8% | 92.2% | 39.1% | 3.45  | 0.46 | 0.824 (0.733-0.894) |
| AFP                            | 26.6% | 90.0% | 95.5% | 13.4% | 2.66 | 0.82 | 0.542 (0.433-0.648) | 66.7% | 77.3% | 90.9% | 40.5% | 2.93  | 0.43 | 0.679 (0.577-0.771) |
| AKR1B10 + AFP                  | 62.0% | 90.0% | 98.0% | 23.1% | 6.20 | 0.42 | 0.828 (0.733-0.900) | 64.0% | 90.9% | 96.0% | 42.6% | 7.04  | 0.40 | 0.822 (0.731-0.892) |
| <b>HCC vs. LC</b>              |       |       |       |       |      |      |                     |       |       |       |       |       |      |                     |
| AKR1B10                        | 72.7% | 83.0% | 94.4% | 43.6% | 4.28 | 0.33 | 0.828 (0.776-0.871) | 65.7% | 78.6% | 88.4% | 32.0% | 3.07  | 0.44 | 0.762 (0.704-0.814) |
| AFP                            | 61.1% | 79.3% | 92.1% | 34.1% | 2.95 | 0.49 | 0.721 (0.663-0.775) | 68.1% | 59.5% | 89.1% | 27.8% | 1.68  | 0.54 | 0.662 (0.599-0.721) |
| AKR1B10 + AFP                  | 79.9% | 83.0% | 94.9% | 51.2% | 4.71 | 0.24 | 0.873 (0.826-0.911) | 77.0% | 73.8% | 93.5% | 39.7% | 2.94  | 0.31 | 0.812 (0.758-0.859) |
| <b>Early-stage HCC vs. LC</b>  |       |       |       |       |      |      |                     |       |       |       |       |       |      |                     |
| AKR1B10                        | 60.8% | 83.0% | 84.2% | 58.7% | 3.58 | 0.47 | 0.743 (0.660-0.816) | 61.3% | 78.6% | 83.6% | 53.2% | 2.86  | 0.49 | 0.724 (0.633-0.802) |
| AFP                            | 46.6% | 79.2% | 76.6% | 49.4% | 2.20 | 0.69 | 0.605 (0.516-0.689) | 66.7% | 59.5% | 74.6% | 50.0% | 1.65  | 0.56 | 0.612 (0.517-0.700) |
| AKR1B10 + AFP                  | 84.8% | 66.0% | 78.8% | 74.5% | 2.50 | 0.23 | 0.798 (0.719-0.863) | 60.0% | 78.6% | 83.3% | 52.4% | 2.80  | 0.51 | 0.730 (0.640-0.807) |

**Abbreviations:** AFP, alpha-fetoprotein; AKR1B10, aldo-keto reductase family 1 member B10; AUC, area under the curve; BLT, benign liver tumor; CHB, chronic hepatitis B virus; HCC, hepatocellular carcinoma; HC, healthy control; LR, likelihood ratio; NPV, negative predictive value; PPV, positive predictive value.

**Supporting TABLE 8. Parameters of AKR1B10 in differentiating HCC with or without cirrhosis from LC.**

|                                                 | Training Cohort |                 |         |         |             |             |                     | Validation Cohort |                 |         |         |             |             |                     |
|-------------------------------------------------|-----------------|-----------------|---------|---------|-------------|-------------|---------------------|-------------------|-----------------|---------|---------|-------------|-------------|---------------------|
|                                                 | Sensitivity (%) | Specificity (%) | PPV (%) | NPV (%) | Positive LR | Negative LR | AUC (95%CI)         | Sensitivity (%)   | Specificity (%) | PPV (%) | NPV (%) | Positive LR | Negative LR | AUC (95%CI)         |
| <b>HCC with cirrhosis vs. LC</b>                |                 |                 |         |         |             |             |                     |                   |                 |         |         |             |             |                     |
| AKR1B10                                         | 70.3%           | 83.0%           | 88.7%   | 59.5%   | 4.14        | 0.36        | 0.813 (0.742-0.871) | 71.3%             | 78.6%           | 88.9%   | 53.2%   | 3.33        | 0.37        | 0.782 (0.705-0.846) |
| AFP                                             | 62.4%           | 77.4%           | 84.0%   | 51.9%   | 2.75        | 0.49        | 0.729 (0.652-0.798) | 79.2%             | 59.5%           | 82.5%   | 54.3%   | 1.96        | 0.35        | 0.711 (0.630-0.784) |
| AKR1B10 + AFP                                   | 76.2%           | 83.0%           | 89.5%   | 64.7%   | 4.49        | 0.29        | 0.859 (0.794-0.910) | 86.1%             | 73.8%           | 88.8%   | 68.9%   | 3.29        | 0.19        | 0.848 (0.773-0.902) |
| <b>Early-stage HCC with cirrhosis vs. LC</b>    |                 |                 |         |         |             |             |                     |                   |                 |         |         |             |             |                     |
| AKR1B10                                         | 59.5%           | 83.0%           | 71.0%   | 74.6%   | 3.50        | 0.49        | 0.721 (0.616-0.810) | 67.5%             | 78.6%           | 75.0%   | 71.7%   | 3.15        | 0.41        | 0.724 (0.614-0.817) |
| AFP                                             | 51.4%           | 79.2%           | 63.0%   | 70.0%   | 2.47        | 0.61        | 0.650 (0.542-0.748) | 70.0%             | 59.5%           | 62.2%   | 67.6%   | 1.73        | 0.50        | 0.617 (0.503-0.722) |
| AKR1B10 + AFP                                   | 81.1%           | 66.0%           | 62.5%   | 83.3%   | 2.39        | 0.29        | 0.776 (0.676-0.857) | 62.5%             | 83.3%           | 78.1%   | 70.0%   | 3.75        | 0.45        | 0.720 (0.610-0.813) |
| <b>HCC without cirrhosis vs. LC</b>             |                 |                 |         |         |             |             |                     |                   |                 |         |         |             |             |                     |
| AKR1B10                                         | 75.0%           | 83.0%           | 90.0%   | 62.0%   | 4.42        | 0.30        | 0.841 (0.776-0.894) | 60.2%             | 78.6%           | 87.3%   | 44.6%   | 2.81        | 0.51        | 0.742 (0.663-0.811) |
| AFP                                             | 63.0%           | 79.2%           | 86.1%   | 51.2%   | 3.03        | 0.47        | 0.714 (0.638-0.782) | 33.0%             | 95.2%           | 94.4%   | 36.7%   | 6.93        | 0.70        | 0.613 (0.529-0.693) |
| AKR1B10 + AFP                                   | 83.3%           | 83.0%           | 90.9%   | 71.0%   | 4.91        | 0.20        | 0.886 (0.826-0.930) | 59.2%             | 83.3%           | 89.7%   | 45.5%   | 3.55        | 0.49        | 0.777 (0.701-0.842) |
| <b>Early-stage HCC without cirrhosis vs. LC</b> |                 |                 |         |         |             |             |                     |                   |                 |         |         |             |             |                     |
| AKR1B10                                         | 69.0%           | 77.4%           | 70.7%   | 75.9%   | 3.50        | 0.40        | 0.764 (0.666-0.845) | 71.4%             | 66.7%           | 64.1%   | 73.7%   | 2.14        | 0.43        | 0.723 (0.609-0.819) |
| AFP                                             | 33.3%           | 88.7%           | 70.0%   | 62.7%   | 2.94        | 0.75        | 0.566 (0.460-0.667) | 62.9%             | 59.5%           | 56.4%   | 65.8%   | 1.55        | 0.62        | 0.606 (0.488-0.715) |
| AKR1B10 + AFP                                   | 88.1%           | 66.0%           | 67.3%   | 87.5%   | 2.59        | 0.18        | 0.817 (0.725-0.889) | 71.4%             | 64.3%           | 62.5%   | 73.0%   | 2.00        | 0.44        | 0.751 (0.639-0.843) |

**Abbreviations:** AFP, alpha-fetoprotein; AKR1B10, aldo-keto reductase family 1 member B10; AUC, area under the curve; HCC, hepatocellular carcinoma; HC, healthy control; LC, liver cirrhosis; LR, likelihood ratio; NPV, negative predictive value; PPV, positive predictive value.

**Supporting TABLE 9. Differentiating parameters of AKR1B10 from pooled all patients with HCC and controls.**

|                                                      | Sensitivity (%) | Specificity (%) | PPV (%) | NPV (%) | Positive LR | Negative LR | AUC (95%CI)         |
|------------------------------------------------------|-----------------|-----------------|---------|---------|-------------|-------------|---------------------|
| <b>Total HCC vs. total HC + BLT + CHB + LC</b>       |                 |                 |         |         |             |             |                     |
| AKR1B10                                              | 73.2%           | 91.0%           | 84.7%   | 83.4%   | 8.14        | 0.29        | 0.869 (0.848-0.888) |
| AFP                                                  | 65.8%           | 86.1%           | 76.1%   | 78.7%   | 4.71        | 0.40        | 0.803 (0.779-0.825) |
| AKR1B10 + AFP                                        | 78.4%           | 94.7%           | 90.9%   | 86.6%   | 14.67       | 0.23        | 0.920 (0.903-0.934) |
| <b>Total early HCC vs. total HC + BLT + CHB + LC</b> |                 |                 |         |         |             |             |                     |
| AKR1B10                                              | 65.9%           | 91.0%           | 64.0%   | 91.6%   | 7.32        | 0.37        | 0.819 (0.792-0.844) |
| AFP                                                  | 58.4%           | 85.8%           | 50.0%   | 89.4%   | 4.11        | 0.49        | 0.749 (0.719-0.777) |
| AKR1B10 + AFP                                        | 71.7%           | 88.7%           | 60.8%   | 92.8%   | 6.37        | 0.32        | 0.857 (0.833-0.880) |
| <b>Total HCC vs. total HC</b>                        |                 |                 |         |         |             |             |                     |
| AKR1B10                                              | 72.8%           | 93.1%           | 91.4%   | 77.2%   | 10.53       | 0.29        | 0.876 (0.853-0.896) |
| AFP                                                  | 65.6%           | 88.7%           | 85.4%   | 71.8%   | 5.79        | 0.39        | 0.817 (0.792-0.841) |
| AKR1B10 + AFP                                        | 79.3%           | 97.1%           | 96.0%   | 82.2%   | 23.63       | 0.21        | 0.930 (0.912-0.945) |
| <b>Total early HCC vs. total HC</b>                  |                 |                 |         |         |             |             |                     |
| AKR1B10                                              | 64.2%           | 92.2%           | 75.0%   | 87.6%   | 8.27        | 0.39        | 0.802 (0.769-0.832) |
| AFP                                                  | 50.3%           | 88.5%           | 61.3%   | 83.1%   | 4.36        | 0.56        | 0.725 (0.689-0.759) |
| AKR1B10 + AFP                                        | 72.3%           | 92.2%           | 77.2%   | 90.2%   | 9.31        | 0.30        | 0.867 (0.839-0.892) |
| <b>Total HCC vs. total CHB + LC</b>                  |                 |                 |         |         |             |             |                     |
| AKR1B10                                              | 65.6%           | 86.6%           | 94.9%   | 39.9%   | 4.90        | 0.40        | 0.810 (0.760-0.840) |
| AFP                                                  | 65.6%           | 67.7%           | 88.5%   | 34.1%   | 2.03        | 0.51        | 0.692 (0.654-0.729) |
| AKR1B10 + AFP                                        | 78.4%           | 81.1%           | 94.0%   | 49.8%   | 4.15        | 0.27        | 0.857 (0.828-0.884) |
| <b>Total early HCC vs. total CHB + LC</b>            |                 |                 |         |         |             |             |                     |
| AKR1B10                                              | 56.6%           | 86.6%           | 85.2%   | 59.5%   | 4.23        | 0.50        | 0.747 (0.694-0.795) |
| AFP                                                  | 56.1%           | 70.1%           | 71.9%   | 53.9%   | 1.87        | 0.63        | 0.629 (0.571-0.684) |
| AKR1B10 + AFP                                        | 65.9%           | 81.1%           | 82.6%   | 63.6%   | 3.49        | 0.42        | 0.779 (0.728-0.825) |

**Abbreviations:** AFP, alpha-fetoprotein; AKR1B10, aldo-keto reductase family 1 member B10; AUC, area under the curve; BLT, benign liver tumor; CHB, chronic hepatitis B virus; HCC, hepatocellular carcinoma; HC, healthy control; LC, liver cirrhosis; LR, likelihood ratio; NPV, negative predictive value; PPV, positive predictive value.
